# Supplementary material
Source: Research Square preprint supplement (doi:10.21203/rs.3.rs-9266450/v1)
Supplement: Supplementary file 1 [file 5fa9a4624ad20a1d480fc0ef.docx]

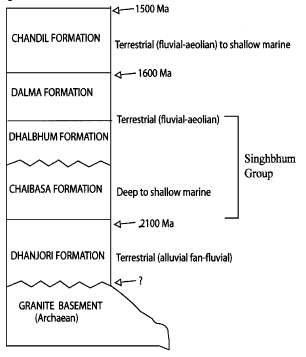


Table 1. Revised Proterozoic stratigraphic succession of the Singhbhum crustal province (Mazumdar, R., 2005).

Table 2. Major element and mineral chemistry of selected sulfides determined from X-ray fluorescence analysis (Major elements are in wt% and trace elements are in ppm.)

| Sample | SiO2 | TiO2 | Al2O3 | Fe2O3 | MnO | MgO | CaO | Na2O | K2O | P2O5 | Cr | Co | Ni | Cu | Zn | Total |
| --- | --- | --- | --- | --- | --- | --- | --- | --- | --- | --- | --- | --- | --- | --- | --- | --- |
| Mica Schist | 60.20 | 0.48 | 16.09 | 2.84 | 0.00 | 0.61 | 0.07 | 0.14 | 7.01 | 0.06 | - | - | - | - | - | 87.49 |
| Quartzite | 86.4 | 0.00 | 6.54 | 1.41 | 0.01 | 0.10 | 0.01 | 2.15 | 0.00 | 0.01 | - | - | - | - | - | 96.24 |
| Ultramafics | 45.05 | 0.01 | 8.60 | 15.58 | 19.02 | 0.18 | 8.81 | 0.28 | 0.05 | 0.13 | 128 | 82 | 63 | 28 | 109 | 98.81 |
| Amphibolite | 65.09 | 0.52 | 17.92 | 5.27 | 4.31 | 0.05 | 0.17 | 2.55 | 3.52 | 0.06 | 84 | 20 | 55 | 6 | 90 | 99.48 |

Mica schist, quartzite, ultramafic and amphibolite; these four characteristic samples were selected for chemical analysis.

Table 3. Calibration of the heating stage

| SL. No. | Chemical compounds | Melting points (°C) | Melting points Recorded (°C) |
| --- | --- | --- | --- |
| 1. | Pure CO2 | -56.6 | -56.5 |
| 2. | Distilled water | 0.0 | 0.2 |
| 3. | Sodium Nitrate | 306.8 | 308.3 |
