# Supplementary material
Source: Research Square preprint supplement (doi:10.21203/rs.3.rs-9266450/v1)
Supplement: Supplementary file 2 [file 6d15d2ed1717a8dcd613c2e0.docx]

**Manuscript Metadata**

**Title**
Controls of gold mineralization in and around the Tamar area, Jharkhand, eastern India

**Running Title**
Gold mineralization controls, Tamar area

**Article Type**
Original Research Article

**Discipline / Subject Area**
Economic Geology / Ore Geology / Precambrian Crustal Evolution

**Authors**

**Kalyan Pal***
Research Scholar, Department of Geology, Central University of Punjab, Bathinda- 151401, India
Email: kalyan.pal@gsi.gov.in

**Prof. A. S. Venkatesh**
Department of Applied Geology, Indian Institute of Technology (Indian School of Mines), Dhanbad – 826004, India

**Rahul Mukherjee**
Department of Geology, Central University of Punjab, Bathinda- 151401, India

*Corresponding author

**Abstract**

The North Singhbhum Mobile Belt (NSMB), forming the southern tectonic margin of the Chhotanagpur Gneissic Complex (CGGC), hosts a recently recognised Paleoproterozoic orogenic gold province in eastern India. Gold mineralization in the Tamar area occurs predominantly as disseminations and quartz–carbonate vein systems hosted by amphibolite-facies supracrustal rocks. This study integrates detailed field mapping, petrography, whole-rock geochemistry, fluid-inclusion microthermometry, and Raman spectroscopy to constrain the lithological, structural, metamorphic, and fluid controls on gold mineralization.

Auriferous zones are preferentially developed within limonitic quartzite, quartzite, carbonaceous phyllite, and amphibolite, and are spatially associated with WNW–ESE-trending ductile to brittle–ductile shear zones that correlate with the South Purulia Shear Zone. Structural traps such as shear planes, fold hinges, lithological contacts, and transient dilatant zones exert first-order control on ore localisation. Petrographic observations reveal native gold occurring in association with pyrite, arsenopyrite, chalcopyrite, and secondary iron oxides within deformed quartz veins and altered host rocks.

Fluid inclusion assemblages are dominated by aqueous–carbonic (CO₂–CH₄–H₂O ± NaCl) fluids with homogenization temperatures ranging from ~245 to 370 °C and moderate salinities. Raman spectroscopy confirms the presence of CO₂, CH₄, graphite, and minor H₂S, indicating reduced fluid conditions favourable for gold transport and precipitation. These physicochemical characteristics, together with metamorphic conditions ranging from greenschist to lower amphibolite facies, are consistent with formation in a mesothermal (orogenic) gold system. Gold mineralisation in the Tamar area is interpreted to have formed during late Paleoproterozoic deformation through structurally focused fluid flow and fluid–rock interaction within a convergent orogenic regime.

**Keywords**

Orogenic gold; North Singhbhum Mobile Belt; Shear zones; Fluid inclusions; Paleoproterozoic mineralization

**Geographical Location**

Tamar area, Ranchi District, Jharkhand, eastern India

**Geological Setting**

Singhbhum Craton, eastern Indian Shield

**Highlights (optional but recommended)**

- Gold mineralization is structurally controlled by shear zones and fractures
- Quartz–carbonate–sulfide veins host primary gold mineralization
- Alteration assemblages include sericite, chlorite, carbonate, and silicification
- Mineralization is linked to late-stage hydrothermal fluid activity
- Implications for Archean–Proterozoic gold exploration in eastern India

**Funding Information**

No external funding received

**Conflict of Interest Statement**

The authors declare no competing interests.

**Data Availability Statement**

All data generated or analyzed during this study are included in the article and its supplementary materials.

**Ethical Statement**

Not applicable (no human or animal subjects involved).

**Acknowledgements**

The authors acknowledge the support of the Department of Applied Geology, IIT (ISM) Dhanbad, and field assistance from colleagues during geological mapping and sampling in the Tamar area.
